# Supplementary figures and images for: Proximal Bilateral Arm Transplantation with Left Shoulder Reconstruction: Outcomes at 24 Months
Source: PubMed Central journal article supplement — Plast Reconstr Surg Glob Open. 2024 Jun 10;12(6):e5884. doi: 10.1097/GOX.0000000000005884 (PMC11163999; doi:10.1097/gox.0000000000005884), 2024-06-10

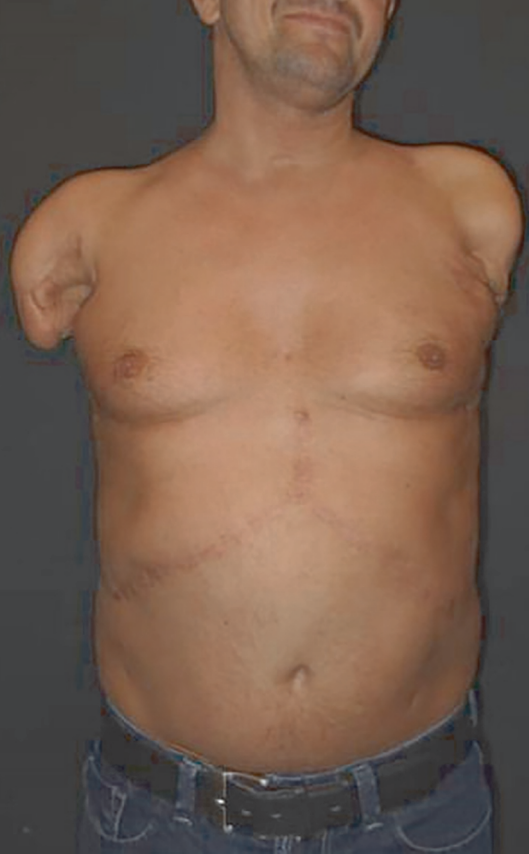

Supplement: gox-12-e5884-s004.pdf [file gox-12-e5884-s004.pdf]
